# Supplementary material
Source: PubMed Central journal article supplement (PMC5419475)
Supplement: 283FileS8.pdf [file 283FileS8.pdf]

# Figure S1.

## A

```

HsRIβ      R R R R G G V S A E 101
CeKIN-2    G G R R T G I S A E 99
wt         GGTGGACGCAGAACCGGAATCTCT
cau1 (R92H)      CAC
ce179 (R92C)    TGC
  
```

## B

### pkAPS prediction results

| Results     |          |       |                                            |         |                |                |                |                |                |                |                |                |                |                 |                 |                 |                 |                 |
|-------------|----------|-------|--------------------------------------------|---------|----------------|----------------|----------------|----------------|----------------|----------------|----------------|----------------|----------------|-----------------|-----------------|-----------------|-----------------|-----------------|
| Description | Position | Score | Sequence                                   | Profile | T <sub>1</sub> | T <sub>2</sub> | T <sub>3</sub> | T <sub>4</sub> | T <sub>5</sub> | T <sub>6</sub> | T <sub>7</sub> | T <sub>8</sub> | T <sub>9</sub> | T <sub>10</sub> | T <sub>11</sub> | T <sub>12</sub> | T <sub>13</sub> | T <sub>14</sub> |
| t7          | 2        | 0.28  | *MTSSSRGYQRVDSSGDGGSLLMEEE                 | 0.31    |                |                |                |                | -0.02          | -0.01          |                |                |                |                 |                 |                 |                 |                 |
|             | 13       | 0.31  | *MTSSSRGYQRVDSGDGGSLLMEEEGDNPHELLHR        | 0.53    | -0.02          | -0.02          |                |                | -0.02          | -0.01          |                | -0.01          |                |                 | -0.12           |                 |                 |                 |
|             | 81       | 0.96  | MDDRVTIPEGFHRRQRSGHEDIDDESDDSKDEEEEEET     | 1.11    | -0.01          |                |                |                | -0.04          | -0.05          | -0.03          |                | -0.02          |                 |                 |                 |                 |                 |
|             | 444      | 0.68  | VLVSELYANLMQKRARNMSREAFIVENLYVSKHIIPPIPTDI | 1.42    | -0.01          |                |                |                |                |                |                | -0.01          | -0.01          |                 | -0.10           | -0.09           | -0.36           | -0.15           |
|             | 502      | 0.64  | TSSSAIDMQSCRFCHSRYSLNRAFK*                 | 0.96    | -0.02          | -0.02          |                |                |                |                |                | -0.06          | -0.01          | -0.13           |                 | -0.01           | -0.06           | -0.01           |

### Summary

Submitted sequences: 1  
Submitted S/T residues: 67  
Number of predicted sites: 5

**Figure S1. Analyses of the *C. elegans* KIN-2 amino acid sequence.** (A) The inhibitory pseudosubstrate domains of the regulatory subunit of KIN-1/PKA (RIβ/KIN-2) from human and *C. elegans* are aligned. The nucleotide exchanges that result in the R<sup>92</sup>H and R<sup>92</sup>C substitution in the *cau1* and *ce179* alleles, respectively, are shown. (B) An *in silico* search for putative PKA phosphorylation sites was performed with the *pkAPS* tool adjusted for scores > 0 (<http://mendel.imp.univie.ac.at/sat/pkaPS>, (NEUBERGER *et al.* 2007)). Five putative PKA-specific phosphorylation sites were predicted along the amino acid sequence of TWK-7, of which the amino acid residues Ser<sup>81</sup>, Ser<sup>444</sup> and Ser<sup>502</sup> were evaluated as highly specific.

**Figure S2.**

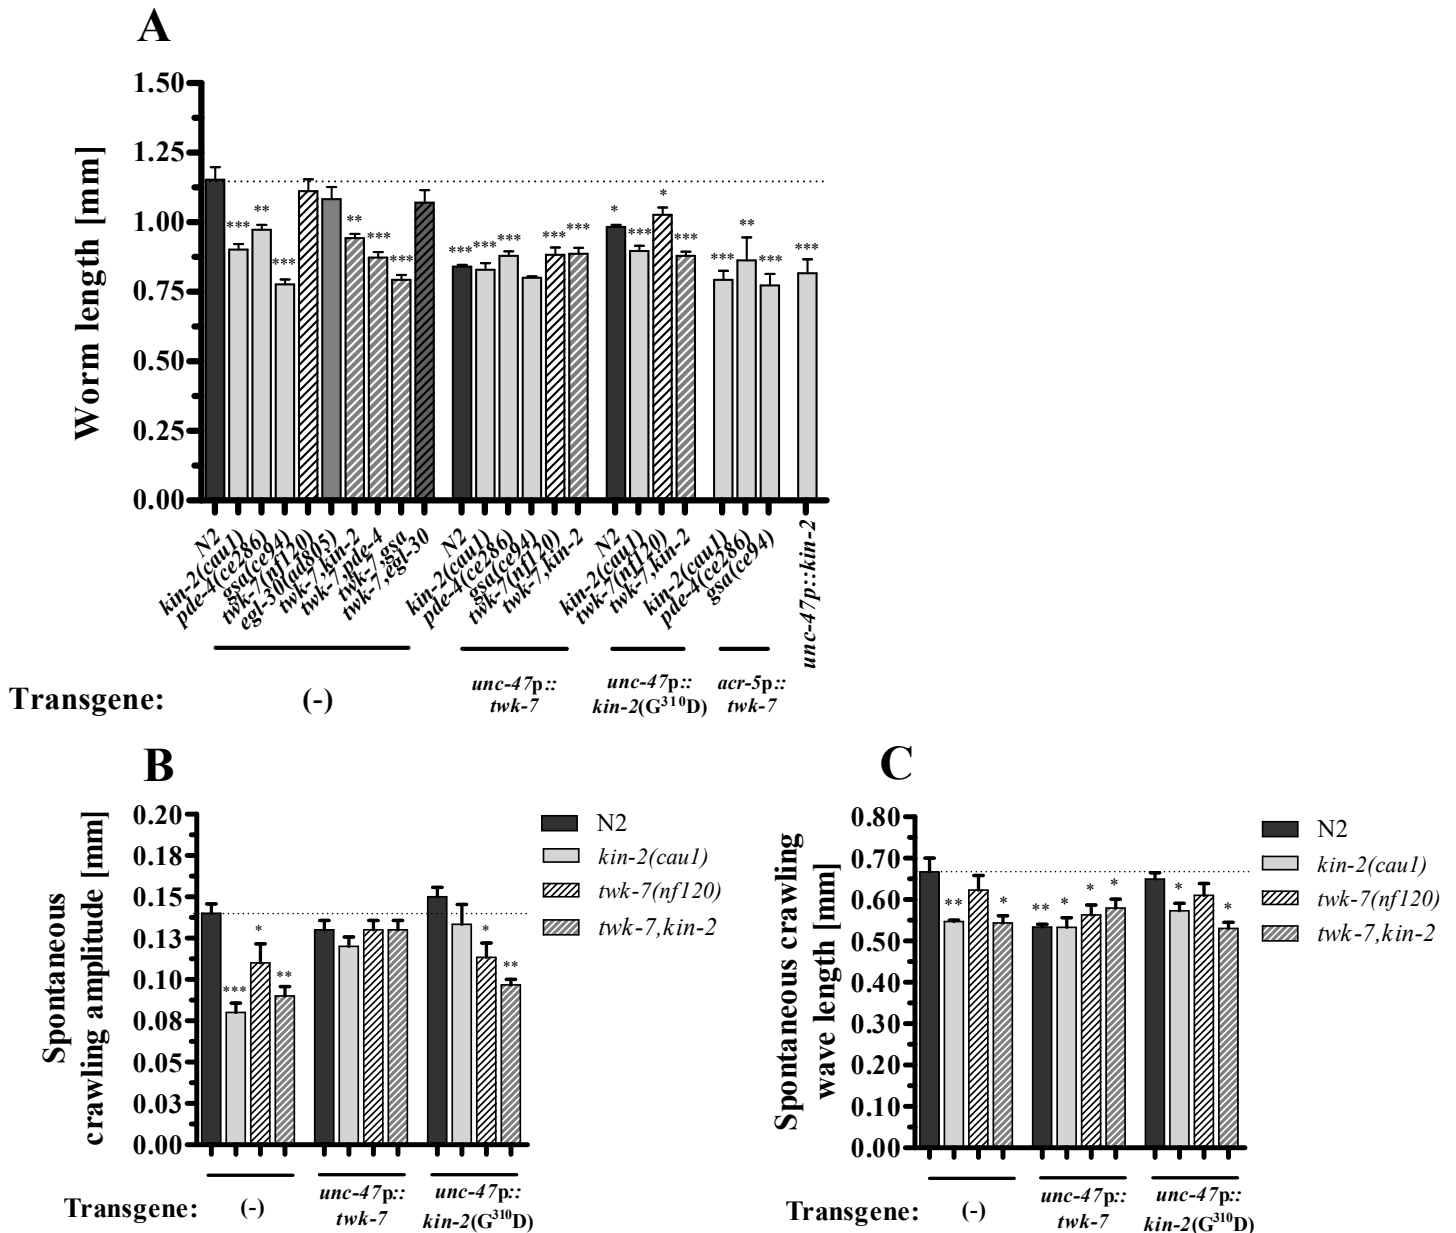

**Figure S2. The body lengths and the absolute values of amplitudes and wavelengths during spontaneous crawling. (A)** The body lengths of non-transgenic and transgenic animals are depicted. Non-transgenic and transgenic  $G\alpha_s$  worms as well as the wild-type and *twk-7(null)* overexpressing the wild-type form of TWK-7 allele in GABAergic neurons are smaller than non-transgenic *twk-7(nf120)* and wild-type animals. In contrast, non-transgenic and transgenic  $G\alpha_{q/0}$  mutants have body lengths that are similar to those of non-transgenic wild-type animals. **(B)** The absolute amplitudes and **(C)** wavelengths of transgenic and non-transgenic *C. elegans* strains with alterations in the  $G\alpha_s$  and *twk-7* background during spontaneous crawling. For the measurement of wave parameters, N = 3 independent experiments with n = 15 worms per trial were evaluated. \* $p < 0.05$ ; \*\* $p < 0.01$ ; \*\*\* $p < 0.001$  (Student's *t*-test).
